# Supplementary material
Source: PubMed Central journal article supplement (PMC4853551)
Supplement: heartjnl-2015-308850-s3.pdf [file heartjnl-2015-308850-s3.pdf]

# **Modelling lifetime costs and health outcomes for patients with stable coronary artery disease**

## **Appendix C: Cost and Health Related Quality of Life Input Parameters**

Panel data methods with time invariant covariates were used to estimate patient costs over each 90 day period. The costs for each individual in the CALIBER data set were calculated and partitioned into equal time periods, with the length of each period matching the 90 days cycle length of the model, to create a longitudinal data set of costs. Panel data estimates based on linear regression were then applied to estimate the costs for use in the model. Using these methods both an underlying background cost as well as an event specific cost for the events (captured using a dummy variable in the time period in which the event occurred) were calculated. Costs were adjusted based on important patient risk factors and co-morbidities to allow for the appropriate capturing of heterogeneity within the model. Aggregate costs were also estimated using the generalised linear model using a log link function to compare with the results generated from the linear model. Both methods gave similar results reassuring us that the linear model was appropriate to use for estimating costs for use in the model.

Mean costs were used in the model along with the cholesky decomposition of the estimated variance covariance matrix from the regression for use in the probabilistic sensitivity analysis.

Costs were assumed to follow a beta distribution. Costs were allocated to states in the model and adjusted for baseline co-variates as well as for patient age and time elapsed since previous non-fatal CVD event.

HRQL estimates were taken from the Sullivan et al (2011) catalogue. The uncertainty around the HRQL was inferred from the standard errors reported in the catalogue and was assumed to follow a gamma distribution.

As with costs the HRQL values were attached to model states and adjusted for baseline patient covariates and updated for patient age as patients progressed through the model.

**Total Costs Mean Estimates**

|                     |                     |                     |                    |                     |                     |                     |             |                    |      |
|---------------------|---------------------|---------------------|--------------------|---------------------|---------------------|---------------------|-------------|--------------------|------|
| fatalCVD            | fatalNONCVD         | firsteventMI        | Midiabetes         | firsteventMI2       | Midiabetes2         | firsteventMI3       | Midiabetes3 | firsteventMI4      | 692  |
|                     | 2008                | 2240                | 5028               | 776                 | 1282                | 1100                | 675         | 785                |      |
| Midiabetes4         | feMI                | feMidiabetes        | firsteventStroke_I | firsteventStroke_I2 | firsteventStroke_I3 | firsteventStroke_I4 | feSTROKE_I  | firsteventStroke_H | 7011 |
|                     | 550                 | 521                 | 369                | 6215                | 1239                | 795                 | 654         | 564                |      |
| firsteventStroke_H2 | firsteventStroke_H3 | firsteventStroke_H4 | feSTROKE_H         | age0                | timeperiod          | diabetes            | hist_liver  | hist_hf            | 364  |
|                     | 1767                | 947                 | 751                | 927                 | 7                   | 10                  | 338         | 530                |      |
| hist_af             | hist_pad            | hist_copd           | hist_cancer        | hist_renal          | sex                 | CHD                 | NSTEMI      | STEMI              | -26  |
|                     | 186                 | 327                 | 231                | 331                 | 756                 | -7                  | -20         | 157                |      |
| UA                  | _cons               |                     |                    |                     |                     |                     |             |                    |      |
|                     | 153                 | 341                 |                    |                     |                     |                     |             |                    |      |

**Total Costs Cholesky Decomposition of Variance Covariance Matrix**

|                     |             |              |            |               |             |               |             |               |         |
|---------------------|-------------|--------------|------------|---------------|-------------|---------------|-------------|---------------|---------|
| fatalCVD            | fatalNONCVD | firsteventMI | Midiabetes | firsteventMI2 | Midiabetes2 | firsteventMI3 | Midiabetes3 | firsteventMI4 |         |
|                     | 24.878      |              |            |               |             |               |             |               |         |
| fatalNONCVD         | 0.158       | 20.161       |            |               |             |               |             |               |         |
| firsteventMI        | 0.128       | 0.106        | 34.413     |               |             |               |             |               |         |
| Midiabetes          | 0.019       | 0.045        | -34.375    | 67.544        |             |               |             |               |         |
| firsteventMI2       | -0.598      | -0.417       | 3.408      | 0.020         | 36.673      |               |             |               |         |
| Midiabetes2         | -0.164      | -0.051       | -3.367     | 7.123         | -36.638     | 72.441        |             |               |         |
| firsteventMI3       | -0.276      | -0.154       | 3.406      | 0.021         | 3.299       | 0.018         |             |               |         |
| Midiabetes3         | -0.099      | -0.337       | -3.361     | 7.102         | -3.259      | 6.874         | -38.830     |               | 77.096  |
| firsteventMI4       | -0.245      | -0.136       | 3.433      | 0.023         | 3.325       | 0.020         | 3.230       |               | 0.018   |
| Midiabetes4         | -0.335      | -0.057       | -3.384     | 7.049         | -3.281      | 6.823         | -3.191      |               | 6.622   |
| feMI                | -0.255      | -0.194       | 3.554      | 0.040         | 3.443       | 0.037         | 3.345       |               | 0.035   |
| feMidiabetes        | -0.131      | -0.124       | -3.471     | 7.076         | -3.365      | 6.845         | -3.273      |               | 6.641   |
| firsteventStroke_I  | 0.130       | 0.146        | 0.062      | 0.038         | 0.057       | 0.034         | 0.052       |               | 0.031   |
| firsteventStroke_I2 | -0.430      | -0.498       | 0.066      | 0.040         | 0.061       | 0.036         | 0.057       |               | 0.033   |
| firsteventStroke_I3 | -0.279      | -0.224       | 0.071      | 0.042         | 0.065       | 0.038         | 0.061       |               | 0.035   |
| firsteventStroke_I4 | -0.222      | -0.239       | 0.075      | 0.044         | 0.070       | 0.040         | 0.066       |               | 0.037   |
| feSTROKE_I          | -0.277      | -0.200       | 0.111      | 0.061         | 0.106       | 0.057         | 0.101       |               | 0.054   |
| firsteventStroke_H  | 0.121       | 0.127        | 0.060      | 0.033         | 0.055       | 0.030         | 0.051       |               | 0.027   |
| firsteventStroke_H2 | -0.501      | -0.572       | 0.061      | 0.034         | 0.056       | 0.031         | 0.053       |               | 0.029   |
| firsteventStroke_H3 | -0.703      | -0.189       | 0.065      | 0.035         | 0.061       | 0.032         | 0.057       |               | 0.030   |
| firsteventStroke_H4 | 0.003       | -0.088       | 0.069      | 0.034         | 0.065       | 0.032         | 0.062       |               | 0.030   |
| feSTROKE_H          | -0.314      | -0.153       | 0.106      | 0.050         | 0.101       | 0.048         | 0.097       |               | 0.046   |
| age0                | -0.012      | -0.013       | -0.003     | -0.001        | -0.002      | -0.001        | -0.001      |               | -0.001  |
| timeperiod          | -0.006      | -0.008       | -0.005     | -0.002        | -0.005      | -0.002        | -0.005      |               | -0.002  |
| diabetes            | -0.066      | -0.025       | 0.196      | -0.551        | 0.164       | -0.468        | 0.141       |               | -0.406  |
| hist_liver          | -0.087      | -0.328       | -0.026     | -0.051        | 0.004       | -0.023        | -0.006      |               | -0.013  |
| hist_hf             | -0.271      | -0.193       | -0.035     | -0.035        | -0.023      | -0.023        | -0.017      |               | -0.012  |
| hist_af             | -0.098      | -0.068       | 0.006      | 0.015         | 0.003       | 0.008         | 0.009       |               | 0.009   |
| hist_pad            | -0.146      | -0.097       | -0.077     | -0.063        | -0.043      | -0.052        | -0.052      |               | -0.042  |
| hist_copd           | 0.003       | -0.113       | -0.023     | -0.008        | -0.020      | -0.008        | -0.013      |               | -0.005  |
| hist_cancer         | 0.011       | -0.470       | -0.014     | 0.004         | -0.011      | 0.005         | -0.004      |               | 0.004   |
| hist_renal          | -0.078      | -0.066       | -0.007     | -0.046        | -0.002      | -0.018        | 0.002       |               | -0.003  |
| sex                 | 0.071       | 0.063        | 0.040      | 0.016         | 0.034       | 0.011         | 0.030       |               | 0.011   |
| CHD                 | -0.036      | 0.043        | -0.047     | -0.013        | -0.040      | -0.012        | -0.038      |               | -0.011  |
| NSTEMI              | -0.220      | -0.045       | -0.240     | -0.195        | -0.219      | -0.160        | -0.191      |               | -0.136  |
| STEMI               | -0.025      | -0.001       | -0.171     | -0.053        | -0.157      | -0.049        | -0.145      |               | -0.046  |
| UA                  | -0.048      | -0.002       | -0.083     | -0.034        | -0.068      | -0.033        | -0.063      |               | -0.029  |
| _cons               | -0.075      | -0.075       | -0.084     | 0.056         | -0.061      | 0.051         | -0.049      |               | 0.044   |
|                     |             |              |            |               |             |               |             |               |         |
| Midiabetes4         | 80.331      |              |            |               |             |               |             |               |         |
| feMI                | 0.034       | 17.361       |            |               |             |               |             |               |         |
| feMidiabetes        | 6.365       | -17.053      | 35.516     |               |             |               |             |               |         |
| firsteventStroke_I  | 0.029       | 0.201        | 0.104      | 36.008        |             |               |             |               |         |
| firsteventStroke_I2 | 0.031       | 0.225        | 0.114      | 3.121         | 37.899      |               |             |               |         |
| firsteventStroke_I3 | 0.033       | 0.247        | 0.124      | 3.103         | 3.004       | 40.821        |             |               |         |
| firsteventStroke_I4 | 0.035       | 0.268        | 0.133      | 3.115         | 3.017       | 3.007         | 42.796      |               |         |
| feSTROKE_I          | 0.053       | 0.435        | 0.208      | 3.303         | 3.199       | 3.188         | 3.113       | 18.906        |         |
| firsteventStroke_H  | 0.026       | 0.192        | 0.093      | 0.062         | 0.058       | 0.053         | 0.051       | 0.177         | 125.411 |
| firsteventStroke_H2 | 0.027       | 0.210        | 0.102      | 0.066         | 0.062       | 0.058         | 0.055       | 0.196         | 11.091  |
| firsteventStroke_H3 | 0.029       | 0.232        | 0.111      | 0.070         | 0.066       | 0.062         | 0.060       | 0.216         | 10.719  |
| firsteventStroke_H4 | 0.029       | 0.255        | 0.116      | 0.074         | 0.071       | 0.066         | 0.064       | 0.236         | 10.546  |
| feSTROKE_H          | 0.046       | 0.420        | 0.188      | 0.114         | 0.111       | 0.105         | 0.102       | 0.385         | 11.324  |
| age0                | 0.000       | -0.002       | -0.001     | -0.004        | -0.004      | -0.003        | -0.002      | -0.006        | -0.001  |
| timeperiod          | -0.002      | -0.024       | -0.011     | -0.005        | -0.006      | -0.005        | -0.005      | -0.022        | -0.001  |
| diabetes            | -0.359      | 0.309        | -0.955     | -0.040        | -0.032      | -0.029        | -0.026      | -0.061        | -0.003  |
| hist_liver          | 0.001       | -0.001       | -0.065     | -0.032        | -0.032      | -0.030        | -0.015      | 0.014         | 0.022   |
| hist_hf             | -0.009      | -0.031       | -0.039     | -0.034        | -0.025      | -0.018        | -0.017      | -0.043        | 0.004   |
| hist_af             | 0.009       | 0.018        | 0.031      | -0.072        | -0.057      | -0.042        | -0.035      | -0.094        | -0.034  |
| hist_pad            | -0.035      | -0.099       | -0.065     | -0.045        | -0.043      | -0.034        | -0.034      | -0.089        | 0.006   |
| hist_copd           | -0.004      | -0.035       | 0.003      | 0.003         | 0.005       | 0.001         | -0.001      | -0.007        | 0.003   |
| hist_cancer         | 0.007       | -0.006       | 0.024      | 0.016         | 0.006       | 0.004         | 0.006       | 0.004         | 0.013   |
| hist_renal          | -0.007      | 0.001        | -0.004     | 0.025         | 0.018       | 0.023         | 0.023       | 0.030         | -0.019  |
| sex                 | 0.008       | 0.079        | 0.032      | 0.009         | 0.007       | 0.007         | 0.005       | 0.017         | 0.015   |
| CHD                 | -0.011      | -0.079       | -0.026     | -0.002        | -0.005      | -0.004        | -0.004      | -0.016        | 0.000   |
| NSTEMI              | -0.128      | -0.423       | -0.352     | -0.002        | -0.008      | -0.013        | -0.012      | -0.053        | 0.006   |
| STEMI               | -0.038      | -0.314       | -0.115     | 0.009         | 0.010       | 0.010         | 0.008       | 0.028         | 0.019   |
| UA                  | -0.022      | -0.142       | -0.057     | -0.021        | -0.022      | -0.021        | -0.021      | -0.065        | -0.010  |
| _cons               | 0.042       | 0.005        | 0.154      | -0.049        | -0.032      | -0.022        | -0.012      | 0.061         | -0.027  |
|                     |             |              |            |               |             |               |             |               |         |
| firsteventStroke_H2 | 138.357     |              |            |               |             |               |             |               |         |
| firsteventStroke_H3 | 10.863      | 154.464      |            |               |             |               |             |               |         |
| firsteventStroke_H4 | 10.687      | 11.061       | 164.086    |               |             |               |             |               |         |
| feSTROKE_H          | 11.475      | 11.876       | 11.772     | 70.462        |             |               |             |               |         |
| age0                | -0.001      | 0.000        | 0.000      | -0.001        | 0.418       |               |             |               |         |
| timeperiod          | -0.001      | -0.001       | -0.001     | -0.006        | 0.004       | 0.175         |             |               |         |
| diabetes            | -0.006      | -0.005       | 0.000      | 0.004         | 0.367       | 0.125         | 13.630      |               |         |
| hist_liver          | 0.028       | 0.022        | 0.018      | 0.043         | 1.366       | 0.231         | -1.452      | 50.663        |         |
| hist_hf             | 0.002       | 0.001        | 0.005      | 0.018         | -2.542      | 0.185         | -0.901      | -0.245        | 11.922  |
| hist_af             | -0.022      | -0.021       | -0.021     | -0.072        | -2.216      | 0.204         | 0.257       | -0.073        | -3.140  |
| hist_pad            | 0.003       | 0.000        | 0.001      | -1.075        | 0.107       | -1.100        | -0.095      | -1.207        | -1.207  |
| hist_copd           | 0.001       | 0.002        | -0.001     | -0.006        | 0.234       | 0.084         | -0.165      | -0.193        | -1.349  |
| hist_cancer         | 0.008       | 0.005        | 0.006      | 0.006         | -2.419      | 0.237         | 0.058       | -0.107        | -0.673  |
| hist_renal          | -0.012      | 0.004        | -0.002     | 0.001         | -1.286      | 0.678         | -2.117      | -0.234        | -2.576  |
| sex                 | 0.012       | 0.011        | 0.005      | 0.006         | -1.768      | 0.003         | 0.346       | -0.137        | -1.153  |
| CHD                 | 0.002       | 0.002        | -0.003     | -0.013        | -0.929      | -0.174        | -0.194      | 0.167         | -0.857  |
| NSTEMI              | 0.023       | 0.017        | 0.014      | 0.014         | -1.753      | 0.294         | -0.696      | -0.080        | -0.939  |
| STEMI               | 0.020       | 0.016        | 0.012      | 0.010         | 1.323       | 0.220         | 0.291       | -0.058        | 1.167   |
| UA                  | -0.005      | 0.001        | 0.004      | -0.007        | 0.133       | 0.002         | -0.156      | -0.140        | -0.694  |
| _cons               | -0.022      | -0.017       | -0.010     | 0.008         | 2.819       | -2.025        | -1.669      | -0.386        | -1.049  |

|             | hist_af | hist_pad | hist_copd | hist_cancer | hist_renal | sex    | CHD    | NSTEMI | STEMI  |
|-------------|---------|----------|-----------|-------------|------------|--------|--------|--------|--------|
| hist_af     | 13.788  |          |           |             |            |        |        |        |        |
| hist_pad    | -0.637  | 17.674   |           |             |            |        |        |        |        |
| hist_copd   | -0.360  | -0.480   | 11.483    |             |            |        |        |        |        |
| hist_cancer | -0.760  | -0.318   | -0.311    | 17.301      |            |        |        |        |        |
| hist_renal  | -1.453  | -1.342   | -0.619    | -1.008      | 20.482     |        |        |        |        |
| sex         | 0.004   | 0.322    | -0.511    | -0.085      | -0.128     | 9.839  |        |        |        |
| CHD         | 0.050   | -0.637   | 0.255     | -0.096      | 0.085      | 1.467  |        |        |        |
| NSTEMI      | -1.260  | -1.190   | -0.180    | -0.509      | -1.422     | 1.143  | 12.227 |        | 17.602 |
| STEMI       | 0.910   | 0.342    | 0.640     | 0.515       | 0.185      | 2.672  | 3.999  |        | -0.043 |
| UA          | -0.357  | -0.569   | -0.364    | -0.098      | -0.192     | 0.553  | 3.999  |        | 1.869  |
| _cons       | -1.637  | -1.070   | -2.398    | -1.330      | -1.035     | -5.049 | -3.999 |        | -1.869 |

|       | UA     | _cons |
|-------|--------|-------|
| UA    | 14.113 |       |
| _cons | -1.906 | 4.823 |

**CVD Specific Costs Mean Estimates**

| fatalCVD      | fatalNONCVD        | firsteventMI        | Mdiabetes           | firsteventMI2       | Mdiabetes2          | firsteventMI3       | Mdiabetes3          |
|---------------|--------------------|---------------------|---------------------|---------------------|---------------------|---------------------|---------------------|
| 2071          | 1737               | 4854                | 674                 | 1209                | 1042                | 640                 | 660                 |
| firsteventMI4 | Mdiabetes4         | feMI                | feMdiabetes         | firsteventStroke_I  | firsteventStroke_I2 | firsteventStroke_I3 | firsteventStroke_I4 |
| 675           | 403                | 481                 | 280                 | 5957                | 1151                | 675                 | 539                 |
| feSTROKE_I    | firsteventStroke_H | firsteventStroke_H2 | firsteventStroke_H3 | firsteventStroke_H4 | feSTROKE_H          | age0                | timeperiod          |
| 448           | 6836               | 1517                | 585                 | 393                 | 670                 | 6                   | 7                   |
| diabetes      | hist_liver         | hist_hf             | hist_af             | hist_pad            | hist_copd           | hist_cancer         | hist_renal          |
| 194           | 279                | 248                 | 221                 | 242                 | 142                 | 154                 | 418                 |
| sex           | CHD                | NSTEMI              | STEMI               | UA                  | _cons               |                     |                     |
| -23           | 2                  | 145                 | 29                  | 125                 | 224                 |                     |                     |

**CVD Specific Costs Cholesky Decomposition of Variance Covariance Matrix**

| fatalCVD            | fatalNONCVD | firsteventMI | Mdiabetes | firsteventMI2 | Mdiabetes2 | firsteventMI3 | Mdiabetes3 |
|---------------------|-------------|--------------|-----------|---------------|------------|---------------|------------|
| fatalCVD            | 21.298      |              |           |               |            |               |            |
| fatalNONCVD         | 0.142       | 17.279       |           |               |            |               |            |
| firsteventMI        | 0.110       | 0.097        | 29.547    |               |            |               |            |
| Mdiabetes           | 0.020       | 0.039        | -29.515   | 57.965        |            |               |            |
| firsteventMI2       | -0.513      | -0.353       | 2.720     | 0.016         | 31.513     |               |            |
| Mdiabetes2          | -0.138      | -0.044       | -2.686    | 5.659         | -31.484    | 62.225        |            |
| firsteventMI3       | -0.231      | -0.125       | 2.722     | 0.017         | 2.654      | 0.015         | 33.415     |
| Mdiabetes3          | -0.081      | -0.288       | -2.685    | 5.648         | -2.621     | 5.508         | -33.386    |
| firsteventMI4       | -0.204      | -0.109       | 2.743     | 0.019         | 2.675      | 0.016         | 2.613      |
| Mdiabetes4          | -0.283      | -0.045       | -2.703    | 5.611         | -2.639     | 5.472         | -2.581     |
| feMI                | -0.210      | -0.158       | 2.817     | 0.032         | 2.748      | 0.030         | 2.685      |
| feMdiabetes         | -0.110      | -0.100       | -2.751    | 5.577         | -2.686     | 5.434         | -2.626     |
| firsteventStroke_I  | 0.114       | 0.127        | 0.055     | 0.035         | 0.050      | 0.031         | 0.046      |
| firsteventStroke_I2 | -0.367      | -0.425       | 0.059     | 0.036         | 0.054      | 0.033         | 0.050      |
| firsteventStroke_I3 | -0.235      | -0.188       | 0.062     | 0.038         | 0.057      | 0.034         | 0.053      |
| firsteventStroke_I4 | -0.184      | -0.199       | 0.065     | 0.039         | 0.061      | 0.036         | 0.057      |
| feSTROKE_I          | -0.230      | -0.163       | 0.094     | 0.053         | 0.090      | 0.050         | 0.086      |
| firsteventStroke_H  | 0.106       | 0.112        | 0.054     | 0.030         | 0.049      | 0.027         | 0.045      |
| firsteventStroke_H2 | -0.429      | -0.488       | 0.054     | 0.030         | 0.049      | 0.028         | 0.046      |
| firsteventStroke_H3 | -0.800      | -0.156       | 0.057     | 0.031         | 0.053      | 0.028         | 0.049      |
| firsteventStroke_H4 | 0.009       | -0.070       | 0.060     | 0.029         | 0.056      | 0.028         | 0.053      |
| feSTROKE_H          | -0.261      | -0.126       | 0.090     | 0.042         | 0.086      | 0.041         | 0.082      |
| age0                | -0.010      | -0.011       | -0.002    | -0.001        | -0.002     | -0.001        | -0.001     |
| timeperiod          | -0.004      | -0.007       | -0.004    | -0.002        | -0.004     | -0.002        | -0.004     |
| diabetes            | -0.053      | -0.021       | 0.162     | -0.454        | 0.137      | -0.389        | 0.118      |
| hist_liver          | -0.067      | -0.261       | -0.020    | -0.043        | 0.003      | -0.020        | -0.005     |
| hist_hf             | -0.216      | -0.155       | -0.029    | -0.028        | -0.019     | -0.019        | -0.014     |
| hist_af             | -0.079      | -0.054       | 0.005     | 0.012         | 0.003      | 0.006         | 0.008      |
| hist_pad            | -0.116      | -0.078       | -0.065    | -0.053        | -0.037     | -0.037        | -0.044     |
| hist_copd           | 0.002       | -0.091       | -0.019    | -0.007        | -0.017     | -0.007        | -0.011     |
| hist_cancer         | 0.010       | -0.369       | -0.012    | 0.003         | -0.009     | 0.003         | -0.003     |
| hist_renal          | -0.066      | -0.056       | -0.007    | -0.040        | -0.003     | -0.016        | 0.001      |
| sex                 | 0.057       | 0.051        | 0.033     | 0.013         | 0.028      | 0.009         | 0.025      |
| CHD                 | -0.029      | 0.034        | -0.039    | -0.011        | -0.034     | -0.010        | -0.032     |
| NSTEMI              | -0.173      | -0.038       | -0.198    | -0.154        | -0.182     | -0.127        | -0.160     |
| STEMI               | -0.025      | -0.001       | -0.143    | -0.051        | -0.133     | -0.046        | -0.122     |
| UA                  | -0.038      | -0.002       | -0.068    | -0.028        | -0.057     | -0.027        | -0.052     |
| _cons               | -0.060      | -0.061       | -0.071    | 0.045         | -0.052     | 0.042         | -0.042     |

| firsteventMI4       | Mdiabetes4 | feMI   | feMdiabetes | firsteventStroke_I | firsteventStroke_I2 | firsteventStroke_I3 | firsteventStroke_I4 |
|---------------------|------------|--------|-------------|--------------------|---------------------|---------------------|---------------------|
| firsteventMI4       | 34.772     |        |             |                    |                     |                     |                     |
| Mdiabetes4          | -34.742    | 69.080 |             |                    |                     |                     |                     |
| feMI                | 2.592      | 0.028  | 14.664      |                    |                     |                     |                     |
| feMdiabetes         | -2.535     | 5.109  | -14.406     | 29.956             |                     |                     |                     |
| firsteventStroke_I  | 0.044      | 0.027  | 0.174       | 0.093              | 30.944              |                     |                     |
| firsteventStroke_I2 | 0.048      | 0.028  | 0.194       | 0.101              | 2.515               | 32.590              |                     |
| firsteventStroke_I3 | 0.052      | 0.030  | 0.213       | 0.109              | 2.504               | 2.438               | 35.117              |
| firsteventStroke_I4 | 0.055      | 0.032  | 0.230       | 0.117              | 2.516               | 2.449               | 2.451               |
| feSTROKE_I          | 0.084      | 0.046  | 0.371       | 0.180              | 2.652               | 2.583               | 2.585               |
| firsteventStroke_H  | 0.043      | 0.023  | 0.166       | 0.082              | 0.056               | 0.052               | 0.047               |
| firsteventStroke_H2 | 0.044      | 0.024  | 0.181       | 0.089              | 0.059               | 0.055               | 0.051               |
| firsteventStroke_H3 | 0.048      | 0.025  | 0.200       | 0.096              | 0.061               | 0.058               | 0.054               |
| firsteventStroke_H4 | 0.052      | 0.025  | 0.219       | 0.099              | 0.065               | 0.062               | 0.058               |
| feSTROKE_H          | 0.081      | 0.039  | 0.358       | 0.160              | 0.097               | 0.094               | 0.089               |
| age0                | -0.001     | 0.000  | -0.002      | -0.001             | -0.004              | -0.003              | -0.002              |
| timeperiod          | -0.004     | -0.002 | -0.020      | -0.009             | -0.004              | -0.005              | -0.005              |
| diabetes            | 0.105      | -0.302 | 0.264       | -0.812             | -0.034              | -0.027              | -0.025              |
| hist_liver          | -0.008     | 0.001  | 0.001       | -0.055             | -0.028              | -0.027              | -0.026              |
| hist_hf             | -0.010     | -0.007 | -0.026      | -0.033             | -0.029              | -0.021              | -0.015              |
| hist_af             | 0.007      | 0.007  | 0.015       | 0.026              | -0.061              | -0.048              | -0.036              |
| hist_pad            | -0.039     | -0.030 | -0.085      | -0.056             | -0.037              | -0.036              | -0.029              |
| hist_copd           | -0.011     | -0.004 | -0.030      | 0.002              | 0.003               | 0.004               | 0.000               |
| hist_cancer         | -0.002     | 0.006  | -0.006      | 0.019              | 0.012               | 0.004               | 0.004               |
| hist_renal          | 0.000      | -0.007 | -0.001      | -0.002             | 0.020               | 0.015               | 0.019               |
| sex                 | 0.022      | 0.007  | 0.068       | 0.028              | 0.007               | 0.005               | 0.005               |
| CHD                 | -0.029     | -0.009 | -0.068      | -0.022             | -0.002              | -0.004              | -0.003              |
| NSTEMI              | -0.143     | -0.103 | -0.359      | -0.289             | -0.003              | -0.007              | -0.011              |
| STEMI               | -0.111     | -0.036 | -0.270      | -0.107             | 0.008               | 0.008               | 0.009               |
| UA                  | -0.048     | -0.019 | -0.121      | -0.047             | -0.018              | -0.019              | -0.018              |
| _cons               | -0.032     | 0.035  | 0.005       | 0.131              | -0.042              | -0.028              | -0.019              |

|                     | feSTROKE_I | firsteventStroke_H | firsteventStroke_H2 | firsteventStroke_H3 | firsteventStroke_H4 | feSTROKE_H | age0   | timeperiod |  |
|---------------------|------------|--------------------|---------------------|---------------------|---------------------|------------|--------|------------|--|
| feSTROKE_I          | 16.041     |                    |                     |                     |                     |            |        |            |  |
| firsteventStroke_H  | 0.154      | 107.730            |                     |                     |                     |            |        |            |  |
| firsteventStroke_H2 | 0.170      | 8.894              | 118.948             |                     |                     |            |        |            |  |
| firsteventStroke_H3 | 0.186      | 8.635              | 8.806               | 132.879             |                     |            |        |            |  |
| firsteventStroke_H4 | 0.203      | 8.510              | 8.677               | 9.024               | 141.206             |            |        |            |  |
| feSTROKE_H          | 0.329      | 9.080              | 9.259               | 9.628               | 9.580               | 59.812     |        |            |  |
| age0                | -0.005     | -0.001             | -0.001              | 0.000               | 0.000               | -0.001     | 0.318  |            |  |
| timeperiod          | -0.019     | -0.001             | -0.001              | -0.001              | -0.001              | -0.005     | 0.004  | 0.150      |  |
| diabetes            | -0.053     | -0.003             | -0.005              | -0.004              | 0.000               | 0.003      | 0.270  | 0.108      |  |
| hist_liver          | 0.012      | 0.018              | 0.003               | 0.019               | 0.015               | 0.037      | 1.037  | 0.196      |  |
| hist_hf             | -0.037     | 0.003              | 0.001               | 0.000               | 0.004               | 0.015      | -1.926 | 0.157      |  |
| hist_af             | -0.080     | -0.029             | -0.018              | -0.018              | -0.018              | -0.062     | -1.686 | 0.174      |  |
| hist_pad            | -0.076     | 0.005              | 0.003               | 0.000               | 0.001               | 0.007      | -0.824 | 0.092      |  |
| hist_copd           | -0.006     | 0.002              | 0.001               | 0.002               | -0.001              | -0.005     | 0.174  | 0.071      |  |
| hist_cancer         | 0.003      | 0.010              | 0.007               | 0.004               | 0.005               | 0.006      | -1.840 | 0.201      |  |
| hist_renal          | 0.025      | -0.016             | -0.010              | 0.003               | -0.002              | 0.001      | -0.966 | 0.586      |  |
| sex                 | 0.014      | 0.012              | 0.010               | 0.010               | 0.004               | 0.005      | -1.343 | 0.004      |  |
| CHD                 | -0.014     | 0.000              | 0.002               | 0.002               | -0.002              | -0.011     | -0.704 | -0.148     |  |
| NSTEMI              | -0.043     | 0.006              | 0.019               | 0.013               | 0.011               | 0.010      | -1.207 | 0.246      |  |
| STEMI               | 0.021      | 0.016              | 0.018               | 0.015               | 0.011               | 0.011      | 0.844  | 0.195      |  |
| UA                  | -0.056     | -0.009             | -0.004              | 0.001               | 0.003               | -0.006     | 0.104  | 0.002      |  |
| _cons               | 0.053      | -0.023             | -0.019              | -0.014              | -0.009              | 0.007      | 2.143  | -1.759     |  |

|             | diabetes | hist_liver | hist_hf | hist_af | hist_pad | hist_copd | hist_cancer | hist_renal |  |
|-------------|----------|------------|---------|---------|----------|-----------|-------------|------------|--|
| diabetes    | 10.359   |            |         |         |          |           |             |            |  |
| hist_liver  | -1.090   | 38.645     |         |         |          |           |             |            |  |
| hist_hf     | -0.685   | -0.185     | 9.058   |         |          |           |             |            |  |
| hist_af     | 0.194    | -0.055     | -2.389  | 10.493  |          |           |             |            |  |
| hist_pad    | -0.834   | -0.072     | -0.921  | -0.487  | 13.439   |           |             |            |  |
| hist_copd   | -0.127   | -0.146     | -1.022  | -0.271  | -0.363   | 8.719     |             |            |  |
| hist_cancer | 0.043    | -0.078     | -0.512  | -0.576  | -0.243   | -0.236    | 13.180      |            |  |
| hist_renal  | -1.617   | -0.174     | -1.970  | -1.103  | -1.024   | -0.476    | -0.766      | 15.727     |  |
| sex         | 0.260    | 0.102      | -0.878  | 0.003   | 0.238    | -0.391    | -0.072      | -0.096     |  |
| CHD         | -0.147   | 0.127      | -0.651  | 0.038   | -0.484   | 0.195     | -0.074      | 0.065      |  |
| NSTEMI      | -0.501   | -0.071     | -0.633  | -0.883  | -0.841   | -0.107    | -0.341      | -1.003     |  |
| STEMI       | 0.187    | -0.033     | 0.781   | 0.595   | 0.179    | 0.455     | 0.336       | 0.058      |  |
| UA          | -0.118   | -0.105     | -0.529  | -0.270  | -0.434   | -0.275    | -0.074      | -0.145     |  |
| _cons       | -1.263   | -0.292     | -0.786  | -1.236  | -0.807   | -1.815    | -1.001      | -0.774     |  |

|        | sex    | CHD    | NSTEMI | STEMI  | UA     | _cons |
|--------|--------|--------|--------|--------|--------|-------|
| sex    | 7.461  |        |        |        |        |       |
| CHD    | 1.116  | 9.259  |        |        |        |       |
| NSTEMI | 0.936  | 3.035  | 13.090 |        |        |       |
| STEMI  | 1.947  | 3.035  | 0.842  | 15.259 |        |       |
| UA     | 0.423  | 3.035  | 1.443  | 1.158  | 10.706 |       |
| _cons  | -3.830 | -3.035 | -1.443 | -1.158 | -1.445 | 3.658 |

**CHD Specific Costs Mean Estimates**

|                     | fatalCVD | fatalNONCVD | firsteventMI | Midiabetes | firsteventMI2 | Midiabetes2 | firsteventMI3 | Midiabetes3 |  |
|---------------------|----------|-------------|--------------|------------|---------------|-------------|---------------|-------------|--|
| fatalCVD            | 1407     |             |              |            |               |             |               |             |  |
| fatalNONCVD         |          | 1068        |              |            |               |             |               |             |  |
| firsteventMI        |          |             | 4658         |            |               |             |               |             |  |
| Midiabetes          |          |             |              | 643        |               |             |               |             |  |
| firsteventMI2       |          |             |              |            | 1166          |             |               |             |  |
| Midiabetes2         |          |             |              |            |               | 792         |               |             |  |
| firsteventMI3       |          |             |              |            |               |             | 590           |             |  |
| Midiabetes3         |          |             |              |            |               |             |               | 701         |  |
| firsteventMI4       |          |             |              |            |               |             |               |             |  |
| Midiabetes4         | 642      |             |              |            |               |             |               |             |  |
| feMI                |          | 330         |              |            |               |             |               |             |  |
| feMidiabetes        |          |             | 475          |            |               |             |               |             |  |
| firsteventStroke_I  |          |             |              | 269        |               |             |               |             |  |
| firsteventStroke_I2 |          |             |              |            | 3029          |             |               |             |  |
| firsteventStroke_I3 |          |             |              |            |               | 620         |               |             |  |
| firsteventStroke_I4 |          |             |              |            |               |             | 415           |             |  |
| feSTROKE_I          |          |             |              |            |               |             |               |             |  |
| firsteventStroke_H  | 256      |             |              |            |               |             |               |             |  |
| firsteventStroke_H2 |          | 2874        |              |            |               |             |               |             |  |
| firsteventStroke_H3 |          |             | 790          |            |               |             |               |             |  |
| firsteventStroke_H4 |          |             |              | 218        |               |             |               |             |  |
| feSTROKE_H          |          |             |              |            | 301           |             |               |             |  |
| age0                |          |             |              |            |               | 251         |               |             |  |
| timeperiod          |          |             |              |            |               |             | 4             |             |  |
| diabetes            |          |             |              |            |               |             |               |             |  |
| hist_liver          | 144      |             |              |            |               |             |               |             |  |
| hist_hf             |          | 198         |              |            |               |             |               |             |  |
| hist_af             |          |             | 143          |            |               |             |               |             |  |
| hist_pad            |          |             |              | 84         |               |             |               |             |  |
| hist_copd           |          |             |              |            | 161           |             |               |             |  |
| hist_cancer         |          |             |              |            |               | 117         |               |             |  |
| hist_renal          |          |             |              |            |               |             | 107           |             |  |
| sex                 |          |             |              |            |               |             |               |             |  |
| CHD                 | -23      |             |              |            |               |             |               |             |  |
| NSTEMI              |          | 82          |              |            |               |             |               |             |  |
| STEMI               |          |             | 219          |            |               |             |               |             |  |
| UA                  |          |             |              | 111        |               |             |               |             |  |
| _cons               |          |             |              |            | 163           |             |               |             |  |

**CHD Specific Costs Cholesky Decomposition of Variance Covariance Matrix**

|                     | fatalCVD | fatalNONCVD | firsteventMI | Midiabetes | firsteventMI2 | Midiabetes2 | firsteventMI3 | Midiabetes3 |  |
|---------------------|----------|-------------|--------------|------------|---------------|-------------|---------------|-------------|--|
| fatalCVD            | 17.056   |             |              |            |               |             |               |             |  |
| fatalNONCVD         | 0.116    | 13.843      |              |            |               |             |               |             |  |
| firsteventMI        | 0.088    | 0.079       | 23.686       |            |               |             |               |             |  |
| Midiabetes          | 0.017    | 0.031       | -23.661      | 46.458     |               |             |               |             |  |
| firsteventMI2       | -0.411   | -0.281      | 2.109        | 0.013      | 25.271        |             |               |             |  |
| Midiabetes2         | -0.109   | -0.035      | -2.082       | 4.379      | -25.247       | 49.891      |               |             |  |
| firsteventMI3       | -0.184   | -0.098      | 2.111        | 0.014      | 2.064         | 0.012       | 26.802        |             |  |
| Midiabetes3         | -0.064   | -0.230      | -2.082       | 4.373      | -2.039        | 4.278       | -26.779       | 53.145      |  |
| firsteventMI4       | -0.161   | -0.085      | 2.128        | 0.015      | 2.081         | 0.013       | 2.038         | 0.012       |  |
| Midiabetes4         | -0.225   | -0.035      | -2.096       | 4.346      | -2.053        | 4.251       | -2.012        | 4.162       |  |
| feMI                | -0.165   | -0.124      | 2.177        | 0.025      | 2.130         | 0.023       | 2.086         | 0.022       |  |
| feMidiabetes        | -0.088   | -0.079      | -2.126       | 4.300      | -2.081        | 4.203       | -2.040        | 4.112       |  |
| firsteventStroke_I  | 0.092    | 0.103       | 0.045        | 0.029      | 0.041         | 0.026       | 0.038         | 0.023       |  |
| firsteventStroke_I2 | -0.294   | -0.340      | 0.048        | 0.030      | 0.044         | 0.027       | 0.040         | 0.024       |  |
| firsteventStroke_I3 | -0.187   | -0.149      | 0.050        | 0.031      | 0.046         | 0.028       | 0.043         | 0.026       |  |
| firsteventStroke_I4 | -0.146   | -0.158      | 0.053        | 0.032      | 0.049         | 0.029       | 0.046         | 0.027       |  |
| feSTROKE_I          | -0.181   | -0.128      | 0.075        | 0.043      | 0.072         | 0.040       | 0.068         | 0.038       |  |
| firsteventStroke_H  | 0.085    | 0.091       | 0.044        | 0.024      | 0.040         | 0.022       | 0.036         | 0.020       |  |
| firsteventStroke_H2 | -0.343   | -0.391      | 0.044        | 0.025      | 0.040         | 0.022       | 0.037         | 0.021       |  |
| firsteventStroke_H3 | -0.480   | -0.123      | 0.046        | 0.025      | 0.042         | 0.023       | 0.040         | 0.021       |  |
| firsteventStroke_H4 | 0.009    | -0.055      | 0.048        | 0.024      | 0.045         | 0.022       | 0.043         | 0.021       |  |
| feSTROKE_H          | -0.207   | -0.099      | 0.071        | 0.033      | 0.068         | 0.032       | 0.065         | 0.031       |  |
| age0                | -0.008   | -0.009      | -0.002       | -0.001     | -0.001        | -0.001      | -0.001        | 0.000       |  |
| timeperiod          | -0.003   | -0.005      | -0.003       | -0.001     | -0.003        | -0.001      | -0.003        | -0.001      |  |
| diabetes            | -0.042   | -0.016      | 0.128        | -0.357     | 0.108         | -0.307      | 0.094         | -0.269      |  |
| hist_liver          | -0.051   | -0.203      | -0.015       | -0.034     | 0.003         | -0.016      | -0.004        | -0.009      |  |
| hist_hf             | -0.168   | -0.121      | -0.023       | -0.022     | -0.015        | -0.015      | -0.011        | -0.008      |  |
| hist_af             | -0.062   | -0.042      | 0.004        | 0.009      | 0.002         | 0.005       | 0.006         | 0.005       |  |
| hist_pad            | -0.090   | -0.061      | -0.051       | -0.042     | -0.042        | -0.030      | -0.035        | -0.029      |  |
| hist_copd           | 0.001    | -0.071      | -0.015       | -0.005     | -0.013        | -0.006      | -0.009        | -0.004      |  |
| hist_cancer         | 0.008    | -0.285      | -0.009       | 0.002      | -0.007        | 0.002       | -0.003        | 0.002       |  |
| hist_renal          | -0.053   | -0.044      | -0.006       | -0.032     | -0.002        | -0.013      | 0.001         | -0.003      |  |
| sex                 | 0.044    | 0.040       | 0.026        | 0.010      | 0.022         | 0.007       | 0.020         | 0.007       |  |
| CHD                 | -0.023   | 0.027       | -0.031       | -0.009     | -0.027        | -0.008      | -0.025        | -0.007      |  |
| NSTEMI              | -0.136   | -0.031      | -0.157       | -0.120     | -0.145        | -0.100      | -0.128        | -0.086      |  |
| STEMI               | -0.018   | 0.001       | -0.112       | -0.041     | -0.104        | -0.038      | -0.097        | -0.035      |  |
| UA                  | -0.030   | -0.002      | -0.054       | -0.022     | -0.045        | -0.022      | -0.042        | -0.019      |  |
| _cons               | -0.047   | -0.048      | -0.056       | 0.035      | -0.042        | 0.033       | -0.034        | 0.029       |  |

|                     | firsteventMI4 | Midiabetes4 | feMI    | feMidiabetes | firsteventStroke_I | firsteventStroke_I2 | firsteventStroke_I3 | firsteventStroke_I4 |
|---------------------|---------------|-------------|---------|--------------|--------------------|---------------------|---------------------|---------------------|
| firsteventMI4       | 27.894        |             |         |              |                    |                     |                     |                     |
| Midiabetes4         | -27.871       | 55.414      |         |              |                    |                     |                     |                     |
| feMI                | 2.018         | 0.022       | 11.667  |              |                    |                     |                     |                     |
| feMidiabetes        | -1.974        | 3.970       | -11.462 | 23.821       |                    |                     |                     |                     |
| firsteventStroke_I  | 0.036         | 0.022       | 0.140   | 0.076        | 24.816             |                     |                     |                     |
| firsteventStroke_I2 | 0.039         | 0.023       | 0.156   | 0.082        | 1.958              | 26.142              |                     |                     |
| firsteventStroke_I3 | 0.042         | 0.024       | 0.171   | 0.089        | 1.951              | 1.903               | 28.173              |                     |
| firsteventStroke_I4 | 0.044         | 0.026       | 0.185   | 0.095        | 1.960              | 1.912               | 1.918               | 29.548              |
| feSTROKE_I          | 0.067         | 0.037       | 0.297   | 0.145        | 2.061              | 2.012               | 2.018               | 1.981               |
| firsteventStroke_H  | 0.035         | 0.019       | 0.134   | 0.066        | 0.046              | 0.042               | 0.038               | 0.036               |
| firsteventStroke_H2 | 0.036         | 0.020       | 0.145   | 0.072        | 0.048              | 0.045               | 0.041               | 0.039               |
| firsteventStroke_H3 | 0.039         | 0.021       | 0.160   | 0.078        | 0.050              | 0.047               | 0.044               | 0.042               |
| firsteventStroke_H4 | 0.041         | 0.020       | 0.175   | 0.080        | 0.052              | 0.050               | 0.046               | 0.045               |
| feSTROKE_H          | 0.065         | 0.031       | 0.286   | 0.127        | 0.078              | 0.075               | 0.071               | 0.069               |
| age0                | -0.001        | 0.000       | -0.001  | -0.001       | -0.003             | -0.002              | -0.002              | -0.002              |
| timeperiod          | -0.003        | -0.002      | -0.016  | -0.007       | -0.003             | -0.004              | -0.004              | -0.004              |
| diabetes            | 0.084         | -0.240      | 0.212   | -0.649       | -0.027             | -0.022              | -0.020              | -0.018              |
| hist_liver          | -0.006        | 0.001       | 0.002   | -0.044       | -0.022             | -0.022              | -0.021              | -0.010              |
| hist_hf             | -0.008        | -0.006      | -0.020  | -0.026       | -0.022             | -0.016              | -0.012              | -0.012              |
| hist_af             | 0.005         | 0.006       | 0.013   | 0.021        | -0.048             | -0.038              | -0.028              | -0.024              |
| hist_pad            | -0.031        | -0.024      | -0.068  | -0.045       | -0.029             | -0.028              | -0.023              | -0.023              |
| hist_copd           | -0.009        | -0.003      | -0.023  | 0.001        | 0.002              | 0.003               | 0.000               | -0.001              |
| hist_cancer         | -0.002        | 0.004       | -0.005  | 0.015        | 0.009              | 0.003               | 0.003               | 0.004               |
| hist_renal          | 0.000         | -0.005      | -0.001  | -0.001       | 0.016              | 0.011               | 0.015               | 0.015               |
| sex                 | 0.017         | 0.005       | 0.054   | 0.022        | 0.005              | 0.004               | 0.004               | 0.003               |
| CHD                 | -0.023        | -0.007      | -0.054  | -0.018       | -0.002             | -0.003              | -0.002              | -0.002              |
| NSTEMI              | -0.114        | -0.081      | -0.291  | -0.227       | -0.004             | -0.007              | -0.010              | -0.009              |
| STEMI               | -0.089        | -0.030      | -0.215  | -0.089       | 0.009              | 0.008               | 0.009               | 0.007               |
| UA                  | -0.038        | -0.015      | -0.097  | -0.037       | -0.014             | -0.015              | -0.014              | -0.014              |
| _cons               | -0.026        | 0.028       | 0.004   | 0.105        | -0.033             | -0.022              | -0.015              | -0.009              |

|                     | feSTROKE_I | firsteventStroke_H | firsteventStroke_H2 | firsteventStroke_H3 | firsteventStroke_H4 | feSTROKE_H | age0   | timeperiod |
|---------------------|------------|--------------------|---------------------|---------------------|---------------------|------------|--------|------------|
| feSTROKE_I          | 12.788     |                    |                     |                     |                     |            |        |            |
| firsteventStroke_H  | 0.124      | 86.379             |                     |                     |                     |            |        |            |
| firsteventStroke_H2 | 0.137      | 6.909              | 95.405              |                     |                     |            |        |            |
| firsteventStroke_H3 | 0.149      | 6.721              | 6.872               | 106.606             |                     |            |        |            |
| firsteventStroke_H4 | 0.162      | 6.627              | 6.776               | 7.062               | 113.304             |            |        |            |
| feSTROKE_H          | 0.263      | 7.052              | 7.210               | 7.513               | 7.489               | 47.692     |        |            |
| age0                | -0.004     | -0.001             | -0.001              | 0.000               | 0.000               | -0.001     | 0.243  |            |
| timeperiod          | -0.015     | -0.001             | -0.001              | -0.001              | -0.001              | -0.004     | 0.003  | 0.120      |
| diabetes            | -0.042     | -0.002             | -0.004              | -0.003              | 0.000               | 0.002      | 0.206  | 0.086      |
| hist_liver          | 0.010      | 0.014              | 0.018               | 0.015               | 0.012               | 0.030      | 0.791  | 0.157      |
| hist_hf             | -0.029     | 0.003              | 0.001               | 0.000               | 0.003               | 0.012      | -1.467 | 0.124      |
| hist_af             | -0.064     | -0.023             | -0.014              | -0.014              | -0.015              | -0.050     | -1.285 | 0.139      |
| hist_pad            | -0.060     | 0.003              | 0.002               | 0.000               | 0.001               | 0.006      | -0.630 | 0.073      |
| hist_copd           | -0.005     | 0.002              | 0.001               | 0.001               | -0.001              | -0.005     | 0.134  | 0.057      |
| hist_cancer         | 0.002      | 0.008              | 0.005               | 0.003               | 0.004               | 0.005      | -1.405 | 0.159      |
| hist_renal          | 0.020      | -0.013             | -0.008              | 0.002               | -0.002              | 0.001      | -0.731 | 0.470      |
| sex                 | 0.011      | 0.010              | 0.008               | 0.008               | 0.004               | 0.004      | -1.024 | 0.003      |
| CHD                 | -0.011     | 0.000              | 0.002               | 0.002               | -0.002              | -0.009     | -0.538 | -0.119     |
| NSTEMI              | -0.037     | 0.005              | 0.015               | 0.011               | 0.010               | 0.014      | -0.935 | 0.203      |
| STEMI               | 0.019      | 0.012              | 0.014               | 0.011               | 0.008               | 0.002      | 0.653  | 0.150      |
| UA                  | -0.045     | -0.007             | -0.003              | 0.001               | 0.003               | -0.005     | 0.080  | 0.001      |
| _cons               | 0.043      | -0.018             | -0.015              | -0.012              | -0.007              | 0.006      | 1.635  | -1.416     |

|        | diabetes | hist_liver | hist_hf | hist_af | hist_pad | hist_copd | hist_cancer | hist_renal |
|--------|----------|------------|---------|---------|----------|-----------|-------------|------------|
| sex    | 5.701    |            |         |         |          |           |             |            |
| CHD    | 0.854    | 7.068      |         |         |          |           |             |            |
| NSTEMI | 0.708    | 2.320      | 10.054  |         |          |           |             |            |
| STEMI  | 1.499    | 2.320      | 0.626   | 11.643  |          |           |             |            |
| UA     | 0.324    | 2.320      | 1.096   | 0.887   | 8.179    |           |             |            |
| _cons  | -2.927   | -2.320     | -1.096  | -0.887  | -1.104   | 2.795     |             |            |

**Health Related Quality of Life**

|                | _cons  | age     | male   | acute_mi | old_mi  | angina  | hf      | stroke  |
|----------------|--------|---------|--------|----------|---------|---------|---------|---------|
| mean           | 0.8280 | -0.0003 | 0.0010 | -0.0626  | -0.0368 | -0.0854 | -0.1167 | -0.1171 |
| standard error | 0.0015 | 0.0002  | 0.0006 | 0.0132   | 0.0257  | 0.0134  | 0.0144  | 0.0121  |

## Variable names and definitions

### Event costs

|                     |                                                                                       |
|---------------------|---------------------------------------------------------------------------------------|
| fatalCVD            | Cost of a fatal cardiovascular event                                                  |
| fatalNONCVD         | Cost of a fatal noncardiovascular event                                               |
| firsteventMI        | Cost of myocardial infarction in first quarter following event                        |
| MIdiabetes          | Additional cost of myocardial infarction in first quarter for patients with diabetes  |
| firsteventMI2       | Cost of myocardial infarction in second quarter following event                       |
| MIdiabetes2         | Additional cost of myocardial infarction in second quarter for patients with diabetes |
| firsteventMI3       | Cost of myocardial infarction in third quarter following event                        |
| MIdiabetes3         | Additional cost of myocardial infarction in second quarter for patients with diabetes |
| firsteventMI4       | Cost of myocardial infarction in fourth quarter following event                       |
| MIdiabetes4         | Additional cost of myocardial infarction in fourth quarter for patients with diabetes |
| feMI                | Cost of myocardial infarction in all subsequent quarters following event              |
| feMIdiabetes        | Additional cost of myocardial infarction in all subsequent for patients with diabetes |
| firsteventStroke_I  | Cost of ischemic stroke in first quarter following event                              |
| firsteventStroke_I2 | Cost of ischemic stroke in second quarter following event                             |
| firsteventStroke_I3 | Cost of ischemic stroke in third quarter following event                              |
| firsteventStroke_I4 | Cost of ischemic stroke in fourth quarter following event                             |
| feSTROKE_I          | Cost of ischemic stroke in all subsequent quarters following event                    |
| firsteventStroke_H  | Cost of hemorrhagic stroke in first quarter following event                           |
| firsteventStroke_H2 | Cost of hemorrhagic stroke in second quarter following event                          |
| firsteventStroke_H3 | Cost of hemorrhagic stroke in third quarter following event                           |
| firsteventStroke_H4 | Cost of hemorrhagic stroke in fourth quarter following event                          |
| feSTROKE_H          | Cost of hemorrhagic stroke in all subsequent quarters following event                 |

### Background cost coefficients for quarter costs

|             |                                                  |
|-------------|--------------------------------------------------|
| age0        | Baseline age                                     |
| timeperiod  | Model cycle number                               |
| diabetes    | History of diabetes                              |
| hist_liver  | History of liver disease                         |
| hist_hf     | History of heart failure                         |
| hist_af     | History of atrial fibrillation                   |
| hist_pad    | History of peripheral artery disease             |
| hist_copd   | History of chronic obstructive pulmonary disease |
| hist_cancer | History of cancer                                |
| hist_renal  | History of renal disease                         |
| sex         | Female                                           |
| CHD         | Other CHD                                        |
| NSTEMI      | NSTEMI                                           |
| STEMI       | STEMI                                            |
| UA          | Unstable Angina                                  |
| _cons       | Constant                                         |
