# Supplementary material
Source: PubMed Central journal article supplement (PMC4853551)
Supplement: heartjnl-2015-308850-s5.pdf [file heartjnl-2015-308850-s5.pdf]

# Modelling lifetime costs and health outcomes for patients with stable coronary artery disease

## Appendix E: Patient Profiles

### Section 1: Patient Risk Deciles

| Patient average covariate profiles based on deciles of 5yr risk of composite CVD primary endpoint |       |       |       |       |        |        |        |        |        |        |         |
|---------------------------------------------------------------------------------------------------|-------|-------|-------|-------|--------|--------|--------|--------|--------|--------|---------|
| Risk Decile                                                                                       | 1     | 2     | 3     | 4     | 5      | 6      | 7      | 8      | 9      | 10     | Overall |
| 5 year risk (average across patients)                                                             | 3.69% | 5.70% | 7.37% | 9.15% | 11.20% | 13.71% | 17.14% | 22.14% | 30.42% | 52.37% | 16.68%  |
| 5 year risk (at average covariate values)                                                         | 3.46% | 5.43% | 6.95% | 8.53% | 10.36% | 12.57% | 15.64% | 20.07% | 27.23% | 44.18% | 11.64%  |
| <b>Socio-demographic characteristics</b>                                                          |       |       |       |       |        |        |        |        |        |        |         |
| Sex (% female)                                                                                    | 64%   | 48%   | 42%   | 39%   | 37%    | 37%    | 38%    | 42%    | 44%    | 46%    | 44%     |
| Age (if male)                                                                                     | 49    | 55    | 59    | 62    | 65     | 67     | 71     | 74     | 77     | 81     | 67      |
| Age (if female)                                                                                   | 53    | 62    | 67    | 70    | 73     | 75     | 78     | 80     | 83     | 87     | 72      |
| Age (weighted average)                                                                            | 52    | 59    | 62    | 65    | 68     | 70     | 73     | 76     | 80     | 84     | 69      |
| Most deprived quintile (%)                                                                        | 15%   | 17%   | 18%   | 19%   | 20%    | 21%    | 21%    | 22%    | 22%    | 24%    | 20%     |
| <b>SCAD diagnosis</b>                                                                             |       |       |       |       |        |        |        |        |        |        |         |
| Other CHD                                                                                         | 11%   | 17%   | 20%   | 22%   | 24%    | 24%    | 25%    | 26%    | 25%    | 20%    | 23%     |
| NSTEMI                                                                                            | 0%    | 1%    | 3%    | 5%    | 8%     | 10%    | 12%    | 17%    | 23%    | 43%    | 10%     |
| STEMI                                                                                             | 1%    | 4%    | 8%    | 12%   | 13%    | 14%    | 13%    | 9%     | 6%     | 4%     | 7%      |
| Unstable angina                                                                                   | 10%   | 13%   | 12%   | 12%   | 12%    | 12%    | 13%    | 15%    | 17%    | 15%    | 14%     |
| Stable angina                                                                                     | 78%   | 65%   | 56%   | 49%   | 43%    | 39%    | 37%    | 34%    | 29%    | 18%    | 47%     |
| <b>SCAD severity</b>                                                                              |       |       |       |       |        |        |        |        |        |        |         |
| PCI in last 6 months                                                                              | 9%    | 12%   | 13%   | 14%   | 13%    | 13%    | 11%    | 9%     | 6%     | 4%     | 9%      |
| CABG in last 6 months                                                                             | 9%    | 7%    | 6%    | 5%    | 5%     | 4%     | 4%     | 3%     | 2%     | 1%     | 4%      |
| Previous/recurrent MI                                                                             | 2%    | 6%    | 10%   | 14%   | 18%    | 23%    | 26%    | 29%    | 32%    | 43%    | 18%     |
| Use of nitrates                                                                                   | 10%   | 16%   | 19%   | 21%   | 24%    | 28%    | 33%    | 37%    | 43%    | 56%    | 28%     |
| <b>Smoking status</b>                                                                             |       |       |       |       |        |        |        |        |        |        |         |
| Current smoker                                                                                    | 31%   | 35%   | 36%   | 37%   | 38%    | 38%    | 37%    | 35%    | 32%    | 30%    | 35%     |
| Ex-smoker                                                                                         | 27%   | 30%   | 31%   | 32%   | 32%    | 33%    | 34%    | 34%    | 34%    | 34%    | 32%     |
| Never smoked                                                                                      | 41%   | 35%   | 33%   | 31%   | 30%    | 29%    | 29%    | 31%    | 33%    | 36%    | 33%     |
| <b>Other CVD risk factors</b>                                                                     |       |       |       |       |        |        |        |        |        |        |         |
| Hypertension                                                                                      | 69%   | 70%   | 71%   | 71%   | 72%    | 74%    | 76%    | 79%    | 83%    | 87%    | 76%     |
| Diabetes                                                                                          | 4%    | 8%    | 10%   | 12%   | 14%    | 16%    | 18%    | 21%    | 24%    | 32%    | 16%     |
| Total cholesterol (mmol/L)                                                                        | 4.95  | 4.91  | 4.84  | 4.79  | 4.74   | 4.74   | 4.70   | 4.68   | 4.64   | 4.54   | 4.79    |
| HDL (mmol/L)                                                                                      | 1.41  | 1.37  | 1.35  | 1.35  | 1.35   | 1.35   | 1.36   | 1.37   | 1.37   | 1.35   | 1.37    |
| <b>CVD co-morbidities</b>                                                                         |       |       |       |       |        |        |        |        |        |        |         |
| Heart failure                                                                                     | 5%    | 7%    | 9%    | 12%   | 15%    | 19%    | 27%    | 37%    | 52%    | 73%    | 26%     |
| Peripheral arterial disease                                                                       | 1%    | 2%    | 3%    | 4%    | 6%     | 8%     | 10%    | 13%    | 16%    | 25%    | 8%      |
| Atrial fibrillation                                                                               | 3%    | 5%    | 7%    | 9%    | 10%    | 13%    | 16%    | 21%    | 29%    | 43%    | 15%     |
| Stroke                                                                                            | 0%    | 1%    | 1%    | 2%    | 3%     | 5%     | 8%     | 14%    | 22%    | 39%    | 9%      |
| <b>Non-CVD co-morbidities</b>                                                                     |       |       |       |       |        |        |        |        |        |        |         |
| Chronic kidney disease                                                                            | 2%    | 2%    | 3%    | 4%    | 4%     | 5%     | 7%     | 9%     | 12%    | 20%    | 7%      |
| Chronic obstructive pulmonary disease                                                             | 20%   | 20%   | 20%   | 21%   | 22%    | 23%    | 25%    | 27%    | 28%    | 30%    | 23%     |
| Cancer                                                                                            | 4%    | 5%    | 6%    | 7%    | 8%     | 9%     | 11%    | 13%    | 14%    | 12%    | 9%      |
| Chronic liver disease                                                                             | 0%    | 1%    | 1%    | 1%    | 1%     | 1%     | 1%     | 1%     | 1%     | 1%     | 1%      |
| <b>Psychosocial characteristics</b>                                                               |       |       |       |       |        |        |        |        |        |        |         |
| Depression at diagnosis                                                                           | 20%   | 17%   | 15%   | 15%   | 14%    | 14%    | 15%    | 17%    | 18%    | 21%    | 17%     |
| Anxiety at diagnosis                                                                              | 7%    | 6%    | 6%    | 7%    | 7%     | 7%     | 8%     | 8%     | 10%    | 12%    | 8%      |
| <b>Biomarkers</b>                                                                                 |       |       |       |       |        |        |        |        |        |        |         |
| Heart rate (b.p.m.)                                                                               | 72    | 71    | 71    | 71    | 71     | 71     | 72     | 73     | 74     | 76     | 72      |
| Creatinine (mmol/L)                                                                               | 88    | 92    | 95    | 96    | 98     | 100    | 101    | 104    | 109    | 125    | 100     |
| White cell count (10 <sup>9</sup> /L)                                                             | 6.81  | 7.05  | 7.19  | 7.31  | 7.44   | 7.54   | 7.62   | 7.76   | 7.88   | 8.22   | 7.46    |
| Haemoglobin (g/100ml)                                                                             | 14.26 | 14.26 | 14.16 | 14.05 | 13.88  | 13.70  | 13.48  | 13.16  | 12.81  | 12.20  | 13.61   |

Section 2: Clinically selected patients

| Sample patient covariate profiles for 10 clinically selected patients |        |        |       |        |        |        |        |        |        |        |
|-----------------------------------------------------------------------|--------|--------|-------|--------|--------|--------|--------|--------|--------|--------|
| Patient Profile                                                       | 1      | 2      | 3     | 4      | 5      | 6      | 7      | 8      | 9      | 10     |
| 5 year risk                                                           | 3.68%  | 5.72%  | 7.59% | 9.26%  | 11.48% | 13.83% | 17.41% | 22.29% | 30.44% | 50.11% |
| <b>Socio-demographic characteristics</b>                              |        |        |       |        |        |        |        |        |        |        |
| Sex                                                                   | Female | Female | Male  | Male   | Male   | Male   | Male   | Male   | Male   | Male   |
| Age                                                                   | 53     | 62     | 59    | 62     | 65     | 67     | 71     | 74     | 76     | 81     |
| Most deprived quintile                                                | -      | -      | TRUE  | -      | -      | TRUE   | -      | -      | TRUE   | -      |
| <b>SCAD diagnosis</b>                                                 |        |        |       |        |        |        |        |        |        |        |
| Other CHD                                                             | -      | -      | -     | -      | TRUE   | TRUE   | TRUE   | TRUE   | -      | -      |
| NSTEMI                                                                | -      | -      | -     | -      | -      | -      | -      | -      | TRUE   | TRUE   |
| STEMI                                                                 | -      | -      | -     | -      | -      | -      | -      | -      | -      | -      |
| Unstable angina                                                       | -      | -      | -     | -      | -      | -      | -      | -      | -      | -      |
| Stable angina                                                         | TRUE   | TRUE   | TRUE  | TRUE   | -      | -      | -      | -      | -      | -      |
| <b>SCAD severity</b>                                                  |        |        |       |        |        |        |        |        |        |        |
| PCI in last 6 months                                                  | -      | -      | -     | -      | -      | -      | -      | -      | -      | -      |
| CABG in last 6 months                                                 | -      | -      | -     | -      | -      | -      | -      | -      | -      | -      |
| Previous/recurrent MI                                                 | -      | -      | -     | -      | TRUE   | -      | TRUE   | -      | -      | -      |
| Use of nitrates                                                       | -      | -      | -     | TRUE   | -      | TRUE   | TRUE   | TRUE   | -      | -      |
| <b>Smoking Status</b>                                                 |        |        |       |        |        |        |        |        |        |        |
| Current smoker                                                        | -      | TRUE   | TRUE  | -      | -      | -      | TRUE   | TRUE   | TRUE   | -      |
| Ex-smoker                                                             | -      | -      | -     | TRUE   | -      | -      | -      | -      | -      | -      |
| Never smoked                                                          | TRUE   | -      | -     | -      | -      | TRUE   | -      | -      | -      | TRUE   |
| <b>Other CVD risk factors</b>                                         |        |        |       |        |        |        |        |        |        |        |
| Hypertension                                                          | TRUE   | TRUE   | TRUE  | TRUE   | TRUE   | TRUE   | TRUE   | TRUE   | TRUE   | TRUE   |
| Diabetes                                                              | -      | -      | -     | -      | -      | -      | -      | -      | -      | TRUE   |
| Total cholesterol (mmol/L)                                            | 5.57   | 4.78   | 4.30  | 6.63   | 4.39   | 4.80   | 4.68   | 4.00   | 3.23   | 3.70   |
| HDL (mmol/L)                                                          | 1.83   | 1.27   | 1.39  | 1.30   | 1.20   | 0.71   | 2.10   | 0.99   | 1.61   | 0.93   |
| <b>CVD co-morbidities</b>                                             |        |        |       |        |        |        |        |        |        |        |
| Heart failure                                                         | -      | -      | -     | -      | -      | -      | -      | TRUE   | TRUE   | TRUE   |
| Peripheral arterial disease                                           | -      | -      | -     | -      | -      | -      | -      | -      | -      | -      |
| Atrial fibrillation                                                   | -      | -      | -     | -      | -      | -      | TRUE   | -      | TRUE   | -      |
| Stroke                                                                | -      | -      | -     | -      | -      | -      | -      | -      | -      | -      |
| <b>Non-CVD co-morbidities</b>                                         |        |        |       |        |        |        |        |        |        |        |
| Chronic kidney disease                                                | -      | -      | -     | -      | -      | -      | -      | -      | -      | -      |
| Chronic obstructive pulmonary disease                                 | -      | TRUE   | TRUE  | -      | -      | -      | TRUE   | -      | TRUE   | -      |
| Cancer                                                                | -      | -      | -     | -      | -      | -      | -      | -      | -      | -      |
| Chronic liver disease                                                 | -      | -      | -     | -      | -      | -      | -      | -      | -      | -      |
| <b>Psychosocial characteristics</b>                                   |        |        |       |        |        |        |        |        |        |        |
| Depression at diagnosis                                               | -      | TRUE   | -     | TRUE   | -      | -      | -      | -      | -      | TRUE   |
| Anxiety at diagnosis                                                  | -      | -      | -     | -      | -      | -      | -      | -      | -      | -      |
| <b>Biomarkers</b>                                                     |        |        |       |        |        |        |        |        |        |        |
| Heart rate (b.p.m.)                                                   | 66     | 69     | 77    | 79     | 70     | 65     | 67     | 78     | 79     | 79     |
| Creatinine (mmol/L)                                                   | 94.35  | 116.34 | 94.00 | 103.00 | 99.83  | 85.00  | 94.00  | 113.00 | 92.54  | 114.00 |
| White cell count (10 <sup>9</sup> /L)                                 | 10.20  | 7.75   | 10.35 | 8.18   | 8.37   | 5.24   | 7.16   | 9.30   | 6.13   | 9.50   |
| Haemoglobin (g/100ml)                                                 | 11.05  | 13.01  | 15.77 | 14.39  | 12.60  | 10.90  | 16.00  | 14.90  | 15.67  | 11.70  |

Section 3: Trial comparable patient populations

| Patient average covariate profiles CALIBER patients matching trial criteria |         |         |
|-----------------------------------------------------------------------------|---------|---------|
| Trial                                                                       | pegasus | odyssey |
| <b>Socio-demographic characteristics</b>                                    |         |         |
| Sex (% female)                                                              | 40%     | 44%     |
| Age (if male)                                                               | 75      | 69      |
| Age (if female)                                                             | 78      | 70      |
| Age (weighted average)                                                      | 76      | 70      |
| Most deprived quintile (%)                                                  | 19%     | 20%     |
| <b>SCAD diagnosis</b>                                                       |         |         |
| Other CHD                                                                   | 0%      | 22%     |
| NSTEMI                                                                      | 64%     | 12%     |
| STEMI                                                                       | 36%     | 8%      |
| Unstable angina                                                             | 0%      | 13%     |
| Stable angina                                                               | 0%      | 45%     |
| <b>SCAD severity</b>                                                        |         |         |
| PCI in last 6 months                                                        | 23%     | 10%     |
| CABG in last 6 months                                                       | 6%      | 5%      |
| Previous/recurrent MI                                                       | 27%     | 20%     |
| Use of nitrates                                                             | 27%     | 29%     |
| <b>Smoking status</b>                                                       |         |         |
| Current smoker                                                              | 28%     | 34%     |
| Ex-smoker                                                                   | 35%     | 32%     |
| Never smoked                                                                | 37%     | 33%     |
| <b>Other CVD risk factors</b>                                               |         |         |
| Hypertension                                                                | 68%     | 75%     |
| Diabetes                                                                    | 22%     | 16%     |
| Total cholesterol (mmol/L)                                                  | 4.22    | 4.75    |
| HDL (mmol/L)                                                                | 1.32    | 1.36    |
| <b>CVD co-morbidities</b>                                                   |         |         |
| Heart failure                                                               | 28%     | 26%     |
| Peripheral arterial disease                                                 | 11%     | 9%      |
| Atrial fibrillation                                                         | 20%     | 16%     |
| Stroke                                                                      | 0%      | 10%     |
| <b>Non-CVD co-morbidities</b>                                               |         |         |
| Chronic kidney disease                                                      | 11%     | 7%      |
| Chronic obstructive pulmonary disease                                       | 24%     | 24%     |
| Cancer                                                                      | 11%     | 9%      |
| Chronic liver disease                                                       | 1%      | 1%      |
| <b>Psychosocial characteristics</b>                                         |         |         |
| Depression at diagnosis                                                     | 14%     | 17%     |
| Anxiety at diagnosis                                                        | 7%      | 8%      |
| <b>Biomarkers</b>                                                           |         |         |
| Heart rate (b.p.m.)                                                         | 70      | 72      |
| Creatinine (mmol/L)                                                         | 106     | 101     |
| White cell count ( $10^9/L$ )                                               | 7.64    | 7.48    |
| Haemoglobin (g/100ml)                                                       | 13.27   | 13.58   |
